# Supplementary material
Source: Springer Nature journal article supplement (https://www.springermedizin.de/resource/supplementary/12916_2012_753_MOESM2_ESM.pdf/9598254)

% individuals with median artery by year of birth

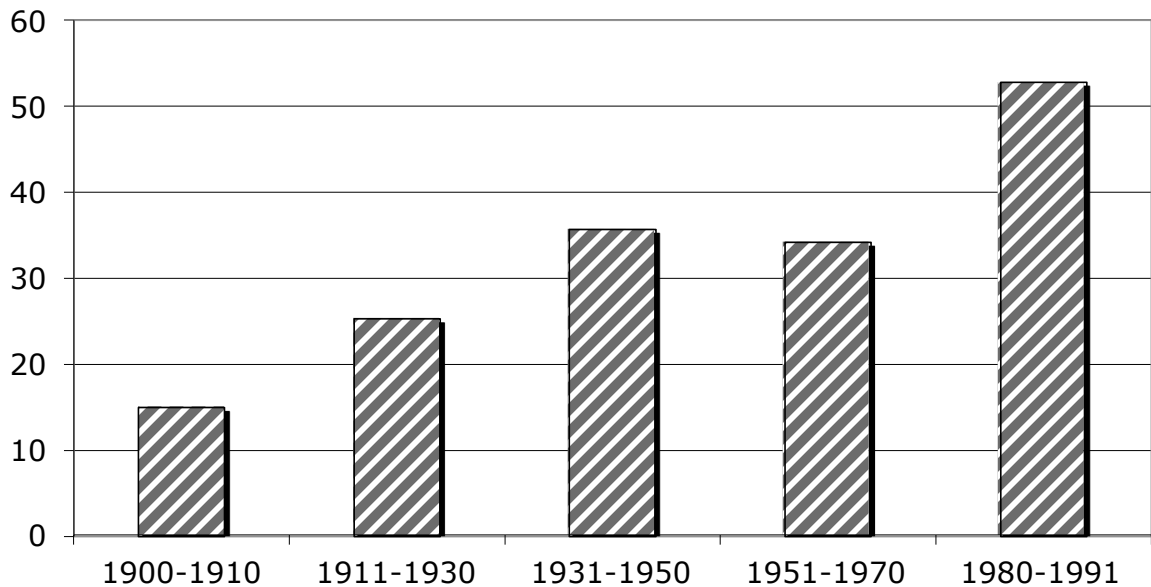

Supplement: MOESM2 [file 9598254]
